# Supplementary material for: Random mutagenesis of a hyperthermophilic archaeon identified tRNA modifications associated with cellular hyperthermotolerance
Source: PubMed Central journal article supplement (PMC6393311; doi:10.1093/nar/gky1313), 2019-01-03
Supplement: gky1313_supplemental_files.pdf [file gky1313_supplemental_files.pdf]

**SUPPLEMENTARY MATERIAL:**

**Random mutagenesis of a hyperthermophilic archaeon identified  
tRNA modifications associated with cellular hyperthermotolerance**

Izumi Orita<sup>1)</sup>, Ryohei Futatsuishi<sup>1)</sup>, Kyoko Adachi<sup>1)</sup>, Takayuki Ohira<sup>2)</sup>, Akira Kaneko<sup>1)</sup>, Keiichi Minowa<sup>2)</sup>, Miho Suzuki<sup>1)</sup>, Takeshi Tamura<sup>1)</sup>, Satoshi Nakamura<sup>1)</sup>, Tadayuki Imanaka<sup>3)</sup>, Tsutomu Suzuki<sup>2)</sup>, and Toshiaki Fukui<sup>1)</sup>\*

School of Life Science and Technology, Tokyo Institute of Technology, Yokohama, Japan<sup>1)</sup>,  
Department of Chemistry and Biotechnology, Graduate School of Engineering, University of Tokyo,  
Tokyo, Japan<sup>2)</sup>, The Research Organization of Science & Technology, Ritsumeikan University,  
Kusatsu, Japan<sup>3)</sup>.

Content:

Supplementary Results

Table S1, S2, S3, S4

Figure S1, S2, S3, S4, S5, S6, S7, S8, S9

## Supplementary Results

### Isolation of 6-methylpurine-resistant mutant for validation of the random mutant library of *T. kodakarensis*

6-Methylpurine (6MP) is known to be toxic for hypoxanthine/guanine phosphoribosyltransferase-positive cells, and TK0664 corresponds to this enzyme in *T. kodakarensis* (1). Three 6MP-resistant mutants could be obtained from the mutant library on 6MP-containing plate medium and showed normal growth on ASW-YT-S<sup>0</sup> medium containing 0.5 mM 6MP at 85°C (Fig. S1 (B)). As expected, sequencing analysis of the rescued plasmids clarified that all the three mutants had transposon insertion within *tk0664* at which direct repeat region was 139-147 bp (Fig. S1 (C)).

### Disruption of predicted restriction endonuclease gene.

The whole genome analysis of *T. kodakarensis* identified 9 genes encoding probable restriction endonucleases. Among them, *tk2239* was disrupted in the  $\Delta$ *pdaD* strain aiming at improving transformation efficiency, because TK2239 shared 28% identity with a type II restriction endonuclease *PhoI* derived from the closely related hyperthermophile *Pyrococcus horikoshii*.

A DNA fragment of *tk2239* together with the 1-kbp flanking regions was amplified with gDNA of *T. kodakarensis* as a template and a primer set of *tk2239\_up/tk2239\_down*. The amplified fragment was inserted into pUD3 harboring *pyrF* marker (2) at the *HincII* site. Inverse PCR with a primer pair *tk2239\_Inv1/tk2239\_Inv2* was then carried out to amplify the flanking regions along with the plasmid backbone, thereby removing the coding region. The amplified fragment was self-ligated after 5'-phosphorylation, and the resulting plasmid was designed as pUD3- $\Delta$ 2239. *T. kodakarensis* strains  $\Delta$ *pdaD* (3) and KU216 (4) were transformed with pUD3- $\Delta$ 2239 to obtain strains of  $\Delta$ 2239 ( $\Delta$ *pdaD*  $\Delta$ *pyrF*  $\Delta$ *tk2239*) and KD2239 ( $\Delta$ *pyrF*  $\Delta$ *tk2239*), respectively. Selection of uracil-prototrophic transformants and 5-fluoroorotic acid (5-FOA)-resistant uracil-autotrophic transformants formed by pop-in and pop-out recombination, respectively, were performed according to the procedure described previously (5).

Upon transformation with the transposon-inserted library DNA, the disruptant  $\Delta$ 2239 showed maximum transformation efficiency of  $6 \times 10^3$  CFU/ $\mu$ g DNA, that was higher than  $3 \times 10^3$  CFU/ $\mu$ g DNA of the parent strain. Further mutagenesis experiments were thus carried out by using  $\Delta$ 2239 as a host strain. The strain KD2239 was used as a control strain in growth measurement of the isolated mutant strains.

## REFERENCES

1. Hileman, T.H. and Santangelo, T.J. (2012) Genetics Techniques for *Thermococcus kodakarensis*. *Front Microbiol*, **3**, 195.
2. Kobori, H., Ogino, M., Orita, I., Nakamura, S., Imanaka, T. and Fukui, T. (2010) Characterization of NADH oxidase/NADPH polysulfide oxidoreductase and its unexpected participation in oxygen sensitivity in an anaerobic hyperthermophilic archaeon. *J Bacteriol*, **192**, 5192-5202.
3. Fukuda, W., Morimoto, N., Imanaka, T. and Fujiwara, S. (2008) Agmatine is essential for the cell growth of *Thermococcus kodakaraensis*. *FEMS Microbiol Lett*, **287**, 113-120.
4. Sato, T., Fukui, T., Atomi, H. and Imanaka, T. (2003) Targeted gene disruption by homologous recombination in the hyperthermophilic archaeon *Thermococcus kodakaraensis* KOD1. *J Bacteriol*, **185**, 210-220.
5. Sato, T., Fukui, T., Atomi, H. and Imanaka, T. (2005) Improved and versatile transformation system allowing multiple genetic manipulations of the hyperthermophilic archaeon *Thermococcus kodakaraensis*. *Appl Environ Microbiol*, **71**, 3889-3899.
6. Atomi, H., Fukui, T., Kanai, T., Morikawa, M. and Imanaka, T. (2004) Description of *Thermococcus kodakaraensis* sp. nov., a well studied hyperthermophilic archaeon previously reported as *Pyrococcus* sp. KOD1. *Archaea*, **1**, 263-267.
7. Fukuda, W., Morimoto, N., Imanaka, T. and Fujiwara, S. (2008) Agmatine is essential for the cell growth of *Thermococcus kodakaraensis*. *FEMS Microbiol Lett*, **287**, 113-120.
8. Santangelo, T.J., Cubonova, L. and Reeve, J.N. (2008) Shuttle vector expression in *Thermococcus kodakaraensis*: contributions of cis elements to protein synthesis in a hyperthermophilic archaeon. *Appl Environ Microbiol*, **74**, 3099-3104.

Table S1. Strains and plasmids used in this study

| Strains                          | Genotypes                                                                                                                                                                                                                                                                     | Source or reference |
|----------------------------------|-------------------------------------------------------------------------------------------------------------------------------------------------------------------------------------------------------------------------------------------------------------------------------|---------------------|
| <i>Escherichia coli</i>          |                                                                                                                                                                                                                                                                               |                     |
| DH5 $\alpha$                     | $\phi$ 80 <i>lacZ</i> $\Delta$ M15 <i>recA1 endA1 gyrA96 thi-1 hsdR17</i> ( $r_{k^-}$ $m_k^+$ ) <i>supE44 relA1 deoR</i> $\Delta$ ( <i>lacZYA-argF</i> ) U169 <i>phoA</i>                                                                                                     |                     |
| HST08                            | F <sup>-</sup> $\phi$ 80 <i>lacZ</i> $\Delta$ M15 <i>recA1 endA1 supE44 thi-1 relA1</i> $\Delta$ ( <i>lacZYA-argF</i> ) U169 $\Delta$ ( <i>mrr-hsdRMS-mcrBC</i> ) <i>gyrA96 phoA</i> $\Delta$ <i>mcrA</i> $\lambda^-$                                                         | Takara Bio          |
| EC100D <i>pir-116</i>            | F <sup>-</sup> <i>mcrA recA1 endA1</i> $\Delta$ ( <i>mrr-hsdRMS-mcrBC</i> ) $\phi$ 80 <i>lacZ</i> $\Delta$ M15 $\Delta$ <i>lacX74 araD139</i> $\Delta$ ( <i>ara, leu</i> )7697 <i>galU galK</i> $\lambda^-$ <i>rpsL</i> ( <i>Str<sup>R</sup></i> ) <i>nupG pir-116</i> (DHFR) | Epicentre           |
| <i>Thermococcus kodakarensis</i> |                                                                                                                                                                                                                                                                               |                     |
| KOD1                             | Wild type                                                                                                                                                                                                                                                                     | (6)                 |
| KU216                            | $\Delta$ <i>pyrF</i> (uracil auxotroph)                                                                                                                                                                                                                                       | (4)                 |
| $\Delta$ <i>pdaD</i>             | $\Delta$ <i>pdaD</i> $\Delta$ <i>pyrF</i> (agmatine and uracil auxotroph)                                                                                                                                                                                                     | (7)                 |
| $\Delta$ 2239                    | $\Delta$ <i>pdaD</i> derivative, $\Delta$ <i>tk2239</i>                                                                                                                                                                                                                       | This study          |
| KD2239                           | KU216 derivative, $\Delta$ <i>tk2239</i>                                                                                                                                                                                                                                      | This study          |
| Plasmids                         |                                                                                                                                                                                                                                                                               |                     |
| pUC118                           | Cloning vector, Amp <sup>r</sup>                                                                                                                                                                                                                                              | Takara Bio          |
| pUD3                             | pUC118 derivative, <i>pyrF</i> marker cassette                                                                                                                                                                                                                                | (2)                 |
| pUD3- $\Delta$ <i>tk2239</i>     | pUD3 derivative, <i>tk2239 del</i> *                                                                                                                                                                                                                                          | This study          |
| pMOD3                            | ColE1 ori, Amp <sup>r</sup> , R6K $\gamma$ ori, mosaic end sequences, MCS                                                                                                                                                                                                     | Epicentre           |
| pMOD3- <i>pdaD</i> -Gm           | pMOD3 derivative, <i>pdaD<sub>Tk</sub></i> , Gm <sup>r</sup>                                                                                                                                                                                                                  | This study          |
| pLC71                            | <i>E. coli-T. kodakarensis</i> shuttle vector, Amp <sup>r</sup> , Km <sup>r</sup> , <i>trpE<sub>Tk</sub></i> , <i>hmgP<sub>f</sub></i>                                                                                                                                        | (8)                 |
| pLCS                             | pLC71 derivative, $\Delta$ <i>trpE<sub>Tk</sub></i> ::MCS (NdeI-StuI-SpeI-NheI-SphI)                                                                                                                                                                                          | This study          |

\* Indicates an insert used for targeted gene deletion.

Table S2. Primer sequences used in this study.

| Primer          | Sequence (5'→3')                                             | Site and others |
|-----------------|--------------------------------------------------------------|-----------------|
| tk2239_up       | CTTGCTCCCCGCTCATCTTGCCCTTC                                   |                 |
| tk2239_down     | GAAGCTCTTCATAGCAAGGCTGTGCGAG                                 |                 |
| tk2239_Inv1     | TTCGATCACCGTTTTATTTTTCTGTGCG                                 |                 |
| tk2239_Inv2     | GCAAGGTATATAACCCTCCTCACGC                                    |                 |
| tk0149-f        | GTTCTAGAGGCCTTCCTTGACCTTGTA                                  |                 |
| tk0149-r        | AATCTAGATCAGTAGGGGAACATGACGACG                               |                 |
| tk0149-N        | ATGAGCTGGACAACCCCAAAG                                        |                 |
| GAT-f2          | TGCCGGGTGACGCACACCGT                                         |                 |
| GAT-r2-Age      | GCAT <u>ACCGGT</u> ACAAGGACAATTAACAGTT                       | AgeI            |
| pMOD3-MCS-Fw    | ATTCAGGCTGCGCAACTGT                                          |                 |
| pMOD3-MCS-Rv    | GTCAGTGAGCGAGGAAGCGGAAG                                      |                 |
| pMOD3-SqFp      | GCCAACGACTACGCACTAGCCAAC                                     |                 |
| pMOD3-SqRp      | GAGCCAATATGCGGAGAACACCCGAGAA                                 |                 |
| pLC71-inv1DKanr | <u>TACTAGTGCTAGCGCATGCCTTCTATCGCCTTCTTGACG</u><br>AGTTCTTCTG | SpeI-NheI-SphI  |
| pLC71-inv2      | GGCCT <u>CATATGCATCACCTTTTTAA</u> CGGCCCTCTC                 | NdeI            |
| mEzTN5SqFp      | AAACATGAGAGCTTAGTACGTAATC                                    |                 |
| mEzTN5SqRp      | TTTTTATTGTTAACTGTTAATTGTCCT                                  |                 |
| EzTN5SqFp       | GGTTGAACTGCCAACGACTACGCACTA                                  |                 |
| EzTN5SqRp       | CGAATTCGAGCCAATATGCGGAGAACACCCGAGAA                          |                 |
| tk0754-Fw-NdeI  | GGAATTCC <u>CATATG</u> ACCGTCAAGGTCCGCTTT                    | NdeI (FFH02)    |
| tk0754-Rv-SphI  | ACAT <u>GCATGCT</u> CAGGTGAGAAGCCTCTTGTA                     | SphI (FFH02)    |
| tk0760_NdeN     | GGAATTCC <u>CATATG</u> GTTCGATTTCAGGTTGAGGTC                 | NdeI (FFH18)    |
| tk0760_XbaC     | GCT <u>CTAGACT</u> ACTTCTCGACTCCCCTCCTAAC                    | XbaI (FFH18)    |
| tk0981_NdeN     | GGAATTCC <u>CATATG</u> CTCTACGTGGAGATACTCGGAAAC              | NdeI (FFH35)    |
| tk0981_SpeC     | CTGTTATAGTT <u>ACTAGT</u> TCAATTCTCAAACACATAGAAGT<br>ACC     | SpeI (FFH35)    |
| tk1198-Fw-NdeI  | GGAATTCC <u>CATATG</u> AGGGTGATAATGGCCGA                     | NdeI (FFH05)    |
| tk1198-Rv-SphI  | ACAT <u>GCATGCT</u> CAAAGCACGTTCCAGGTA                       | SphI (FFH05)    |
| Tk1328_NdeN     | GGAATTCC <u>CATATG</u> ATATCAGTCGGAGATAGAGTTCTTC<br>TC       | NdeI (FFH20)    |
| Tk1328_XbaC     | GCT <u>CTAGAGT</u> CACAGCTTCCTGAGGAAGGTTATG                  | XbaI (FFH20)    |
| tk0672-Fw-NdeI  | GGAATTCC <u>CATATG</u> AGGTTCTACATCTGCAGGGAA                 | NdeI (FFH15)    |
| tk0672-Rv-SphI  | ACAT <u>GCATGCT</u> CAGCACTTCCCGTTCGC                        | SphI (FFH15)    |
| tk1803-Fw-NdeI  | GGATTCC <u>CATATG</u> GGATTTGGTAGGTACGTGCTGAT                | NdeI (FFH12)    |
| tk1803-Rv-SpeI  | GG <u>ACTAGT</u> TCACACATTCTGGGATGCACCAACC                   | SpeI (FFH12)    |
| tk0647-Fw-NdeI  | GGAATTCC <u>CATATG</u> AACATCCAGAATGCTG                      | NdeI (FFH27)    |
| tk0647-Rv-SpeI  | GG <u>ACTAGT</u> TTAATCAACTTTGAAACACAGAACA                   | SpeI (FFH27)    |
| tk1402-Fw-NdeI  | GGAATTCC <u>CATATG</u> AAAAAATTGCTGGTAATAA                   | NdeI (FFH08)    |
| tk1402-Rv-SphI  | ACAT <u>GCATGCT</u> CAACGTTTCGTGGTTGGGAGA                    | SphI (FFH08)    |
| tk2145-Fw-NdeI  | GGAATTCC <u>CATATG</u> GCTGAAAGCATTGGCG                      | NdeI (FFH22)    |
| tk2145-Rv-SpeI  | GG <u>ACTAGT</u> CACTCCTTGTTACGCCC                           | SpeI (FFH22)    |

Table S3. Transposon insertion sites in *T. kodakarensis* partially thermosensitive mutants isolated by random mutagenesis.

| Predicted function     | Transposon insertion site | Annotation                                                                       | Mutant strain (Direct repeat region [bp no.]) |
|------------------------|---------------------------|----------------------------------------------------------------------------------|-----------------------------------------------|
| metabolism             | <i>tk0260</i>             | aromatic aminotransferase                                                        | FFH09 (308-316)                               |
|                        | <i>tk1405</i>             | phosphoenolpyruvate carboxykinase                                                | FFH13 (849-857)                               |
|                        | <i>tk1406</i>             | maltodextrin phosphorylase                                                       | FFH19 (863-871 and 430-bp deletion)           |
|                        | <i>tk0262</i>             | chorismate synthase                                                              | FFH37 (691-699)                               |
|                        | <i>tk0245</i>             | imidazoleglycerol-phosphate dehydratase HisB                                     | FFH38 (311-319)                               |
| cellular process       | <i>tk0635</i>             | chemotaxis histidine kinase, frame shift                                         | FFH01 (134-142)                               |
|                        | <i>tk1179</i>             | adenylate cyclase, class 2                                                       | FFH28 (101-109)                               |
|                        | <i>tk1361</i>             | MCM2/3/5 family DNA replication licensing factor                                 | FFH29 (420-428)                               |
|                        | <i>tk0701</i>             | ATPase (MinD superfamily P-loop ATPase containing an inserted ferredoxin domain) | FFH31 (470-478)                               |
| transport              | <i>tk0658</i>             | simple sugar transport system ATP-binding protein                                | FFH06 (1076-1084)                             |
|                        | <i>tk0707</i>             | ABC-type iron(III)-siderophore transport system permease                         | FFH10 (not determined) <sup>1)</sup>          |
|                        | <i>tk1771</i>             | ABC-type maltodextrin transport system maltodextrin-binding periplasmic protein  | FFH23 (1259-1267)                             |
| degradation            | <i>tk0699</i>             | zinc-dependent protease                                                          | FFH26 (289-297)                               |
|                        | <i>tk1169</i>             | exosome complex RNA-binding protein Csl4                                         | FFH34 (246-254)                               |
|                        | <i>tk2252</i>             | proteasome-activating nucleotidase                                               | FFH03 (76-84)<br>FFH04 (547-555)              |
| mobile genetic element | <i>tk0575</i>             | integrase, <i>N</i> -fragment                                                    | FFH39 (25-33)                                 |
| unknown                | <i>tk0437</i>             | hypothetical protein                                                             | FFH07 (1210-1218)                             |
|                        | <i>tk2157</i>             | hypothetical protein                                                             | FFH14 (4-12)                                  |
|                        | <i>tk2174</i>             | hypothetical protein                                                             | FFH30 (127-135)                               |

1) Sequencing of the junction regions was unsuccessful.

**Table S4A.** List of predicted RNA fragments with G<sup>+</sup>15 (RNase T<sub>1</sub>-digestion)

| No. | Sequence of RNA fragments                                | Molecular mass | <i>m/z</i> (-2) | Mass spectrum | CID          | Possible tRNAs                                                                                                                                       | # of tRNAs |
|-----|----------------------------------------------------------|----------------|-----------------|---------------|--------------|------------------------------------------------------------------------------------------------------------------------------------------------------|------------|
| 1   | UCUAG <sup>+</sup> ACUGp                                 | 2935.40        | 1466.69         | Observed      | Not assigned | Val(CAC), Val(GAC)                                                                                                                                   | 2          |
| 2   | CCUAG <sup>+</sup> CCAGp                                 | 2933.43        | 1465.71         | Observed      | Assigned     | Arg(CCT)                                                                                                                                             | 1          |
| 3   | CCUAG <sup>+</sup> UCUGp/<br>UCUAG+CCUGp/<br>CUUAG+CCUGp | 2911.38        | 1454.68         | Observed      | Not assigned | Arg(CCG), Arg(GCG), Arg(TCG), Gly(CCC), Gly(GCC), Gly(TCC), Lys(CTT), eMet(CAT)                                                                      | 8          |
| 4   | CUCAG <sup>+</sup> CCUGp/<br>CCUAG+CCUGp/<br>CCUAG+CUCGp | 2910.40        | 1454.19         | Observed      | Not assigned | Ala(CGC), Ala(GGC), Ala(TGC), Ile(GAT), Ile(CAT), Lys(TTT), Phe(GAA), Ser(CGA), Ser(GCT), Ser(GGA), Ser(TGA), Thr(TGT), Tyr(GTA), Thr(GGT), Thr(CGT) | 15         |
| 5   | UCUAG <sup>+</sup> AUGp                                  | 2630.35        | 1314.17         | Observed      | Assigned     | Val(TAC)                                                                                                                                             | 1          |
| 6   | CCUAG <sup>+</sup> CAGp                                  | 2628.39        | 1313.19         | Observed      | Assigned     | Arg(TCT)                                                                                                                                             | 1          |
| 7   | CUUAG <sup>+</sup> UUGp                                  | 2607.33        | 1302.66         | Observed      | Assigned     | Asn(GTT)                                                                                                                                             | 1          |
| 8   | CCUAG <sup>+</sup> AGp                                   | 2323.34        | 1160.66         | Observed      | Not assigned | Cys(GCA)                                                                                                                                             | 1          |
| 9   | CAG <sup>+</sup> CUAGp                                   | 2323.34        | 1160.66         | Observed      | Assigned     | iMet(CAT)                                                                                                                                            | 1          |
| 10  | UAG <sup>+</sup> CUUGp                                   | 2301.30        | 1149.64         | Observed      | Assigned     | Pro(CGG), Pro(GGG), Pro(TGG)                                                                                                                         | 3          |
| 11  | UAG <sup>+</sup> CCUGp                                   | 2300.32        | 1149.15         | Observed      | Assigned     | His(GTG), Trp(CCA)                                                                                                                                   | 2          |
| 12  | UAG <sup>+</sup> CCCGp                                   | 2299.33        | 1148.66         | Observed      | Assigned     | Asp(GCT), Glu(CTC), Glu(TTC)                                                                                                                         | 3          |
| 13  | AG <sup>+</sup> CCUGp                                    | 1994.29        | 996.14          | Observed      | Assigned     | Leu(CAA), Leu(CAG), Leu(GAG), Leu(TAA), Leu(TAG)                                                                                                     | 5          |
| 14  | UAG <sup>+</sup> CG                                      | 1689.25        | 843.62          | Observed      | Assigned     | Gln(CTG), Gln(TTG)                                                                                                                                   | 2          |

**Table S4B.** List of RNA fragments with m<sup>1</sup>A58 (RNase A-digestion)

| No. | Sequence of RNA fragments              | Molecular mass | <i>m/z</i> (-2) | Mass spectrum | CID      | Possible tRNAs                                                                                                                                                                                                                                                                                              | # of tRNAs |
|-----|----------------------------------------|----------------|-----------------|---------------|----------|-------------------------------------------------------------------------------------------------------------------------------------------------------------------------------------------------------------------------------------------------------------------------------------------------------------|------------|
| 1   | Cmm <sup>1</sup> Im <sup>1</sup> AAUp  | 1659.27        | 828.63          | Observed      | Assigned | Ala(CGC), Ala(GGC), Arg(GCG), Arg(TCG), Asp(GTC), Cys(GCA), Glu(CTC), Glu(TTC), Gly(CCC), Gly(GCC), Gly(TCC), His(GTG), iMet(CAT), Leu(CAA), Leu(CAG), Leu(GAG), Leu(TAG), Phe(GAA), Pro(CGG), Pro(GGG), Pro(TGG), Ser(CGA), Ser(GCT), Ser(GGA), Ser(TGA), Thr(CGT), Thr(GGT), Thr(TGT), Trp(CCA), Tyr(GTA) | 30         |
| 2   | CmGm <sup>1</sup> AAUp                 | 1660.26        | 829.12          | Observed      | Assigned | Ala(TGC), Arg(CCG), Arg(TCT), Asn(GTT), Gln(CTG), Gln(TTG), Leu(TAA), Lys(CTT), Lys(TTT), Val(CAC), Val(GAC), Val(TAC)                                                                                                                                                                                      | 12         |
| 3   | Cmm <sup>1</sup> Im <sup>1</sup> AAGCp | 2003.33        | 1000.66         | Observed      | Assigned | Ile(CAT), eMet(CAT)                                                                                                                                                                                                                                                                                         | 2          |
| 4   | CmGm <sup>1</sup> AAGCp                | 2004.32        | 1001.15         | Observed      | Assigned | Arg(CCT), Ile(GAT)                                                                                                                                                                                                                                                                                          | 2          |

**Table S4C.** List of RNA fragments with m<sup>2</sup>G10/m<sup>2,2</sup>G10 or m<sup>2,2</sup>G26 (RNase T<sub>1</sub>-digestion)

| No. | Sequence of RNA fragments                           | Molecular mass | <i>m/z</i> (-1 or -2) | Mass spectrum | CID      | Possible tRNAs                                                                                                                                                                                                              | # of tRNAs |
|-----|-----------------------------------------------------|----------------|-----------------------|---------------|----------|-----------------------------------------------------------------------------------------------------------------------------------------------------------------------------------------------------------------------------|------------|
| 1   | Um <sup>1</sup> Am <sup>2</sup> Gp<br>(position 10) | 1008.16        | 1007.15               | Observed      | Assigned | Ala(CGC), Ala(GGC), Ala(UCG), Arg(CCT), Arg(TCT), Asn(GTT), Gly(CCC), Gly(GCC), Gly(TCC), Leu(CAG), Leu(TAG), Lys(CTT), Lys(TTT), Ile(CAT), eMet(CAT), Phe(GAA), Ser(CGA), Ser(GCT), Ser(GGA), Thr(CGT), Thr(TGT), Tyr(GTA) | 22         |
| 2   | m <sup>2,2</sup> GUGp<br>(position 10)              | 1024.15        | 1023.14               | Observed      | Assigned | Asp(GTC), Gln(CTG), Gln(TTG), Glu(CTC), Glu(TTC), His(GTG), Trp(CCA)                                                                                                                                                        | 7          |
| 3   | Cm <sup>2,2</sup> GCCGp<br>(position 26)            | 1633.25        | 815.62                | Observed      | Assigned | Ala(CGC), Ala(GGC), Arg(TCT), Asn(GTT), Phe(GAA), Ser(GCT)                                                                                                                                                                  | 6          |
| 4   | Cm <sup>2,2</sup> GUCGp<br>(position 26)            | 1634.23        | 816.11                | Observed      | Assigned | Ala(TGC), Arg(CCG), Arg(TCG)                                                                                                                                                                                                | 3          |

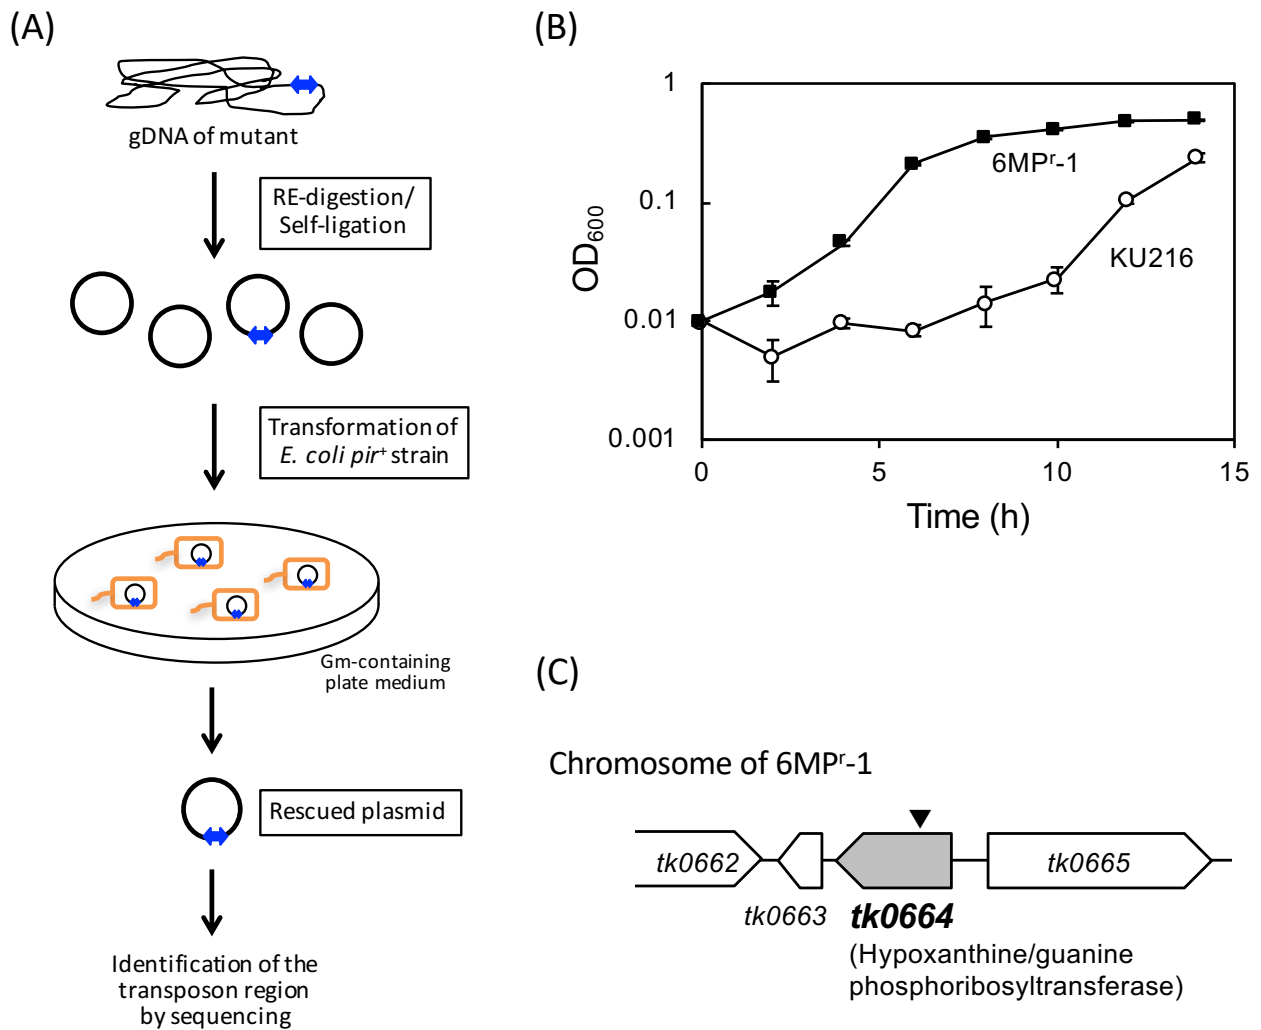

Fig. S1. (A) Scheme of plasmid rescue for identification of a transposon-inserted region in the isolated mutant. The blue double-headed arrow indicates the artificial transposon region containing R6Kg ori and gentamycin (Gm)-resistant cassette. (B) Growth of 6-methylpurine (6MP)-resistant mutant 6MP<sup>r</sup>-1 (■) and control strain KU216 (○) of *T. kodakarensis* in ASW-YT-S<sup>0</sup> medium containing 0.5 mM 6MP at 85°C. (C) Gene organization of the transposon-inserted region in *T. kodakarensis* 6MP<sup>r</sup>-1 chromosome. The transposon region in 6MP<sup>r</sup>-1 was identified within *tk0664* with direct repeat of 148-156 bp region of the gene.



[tRNA modification mutants]

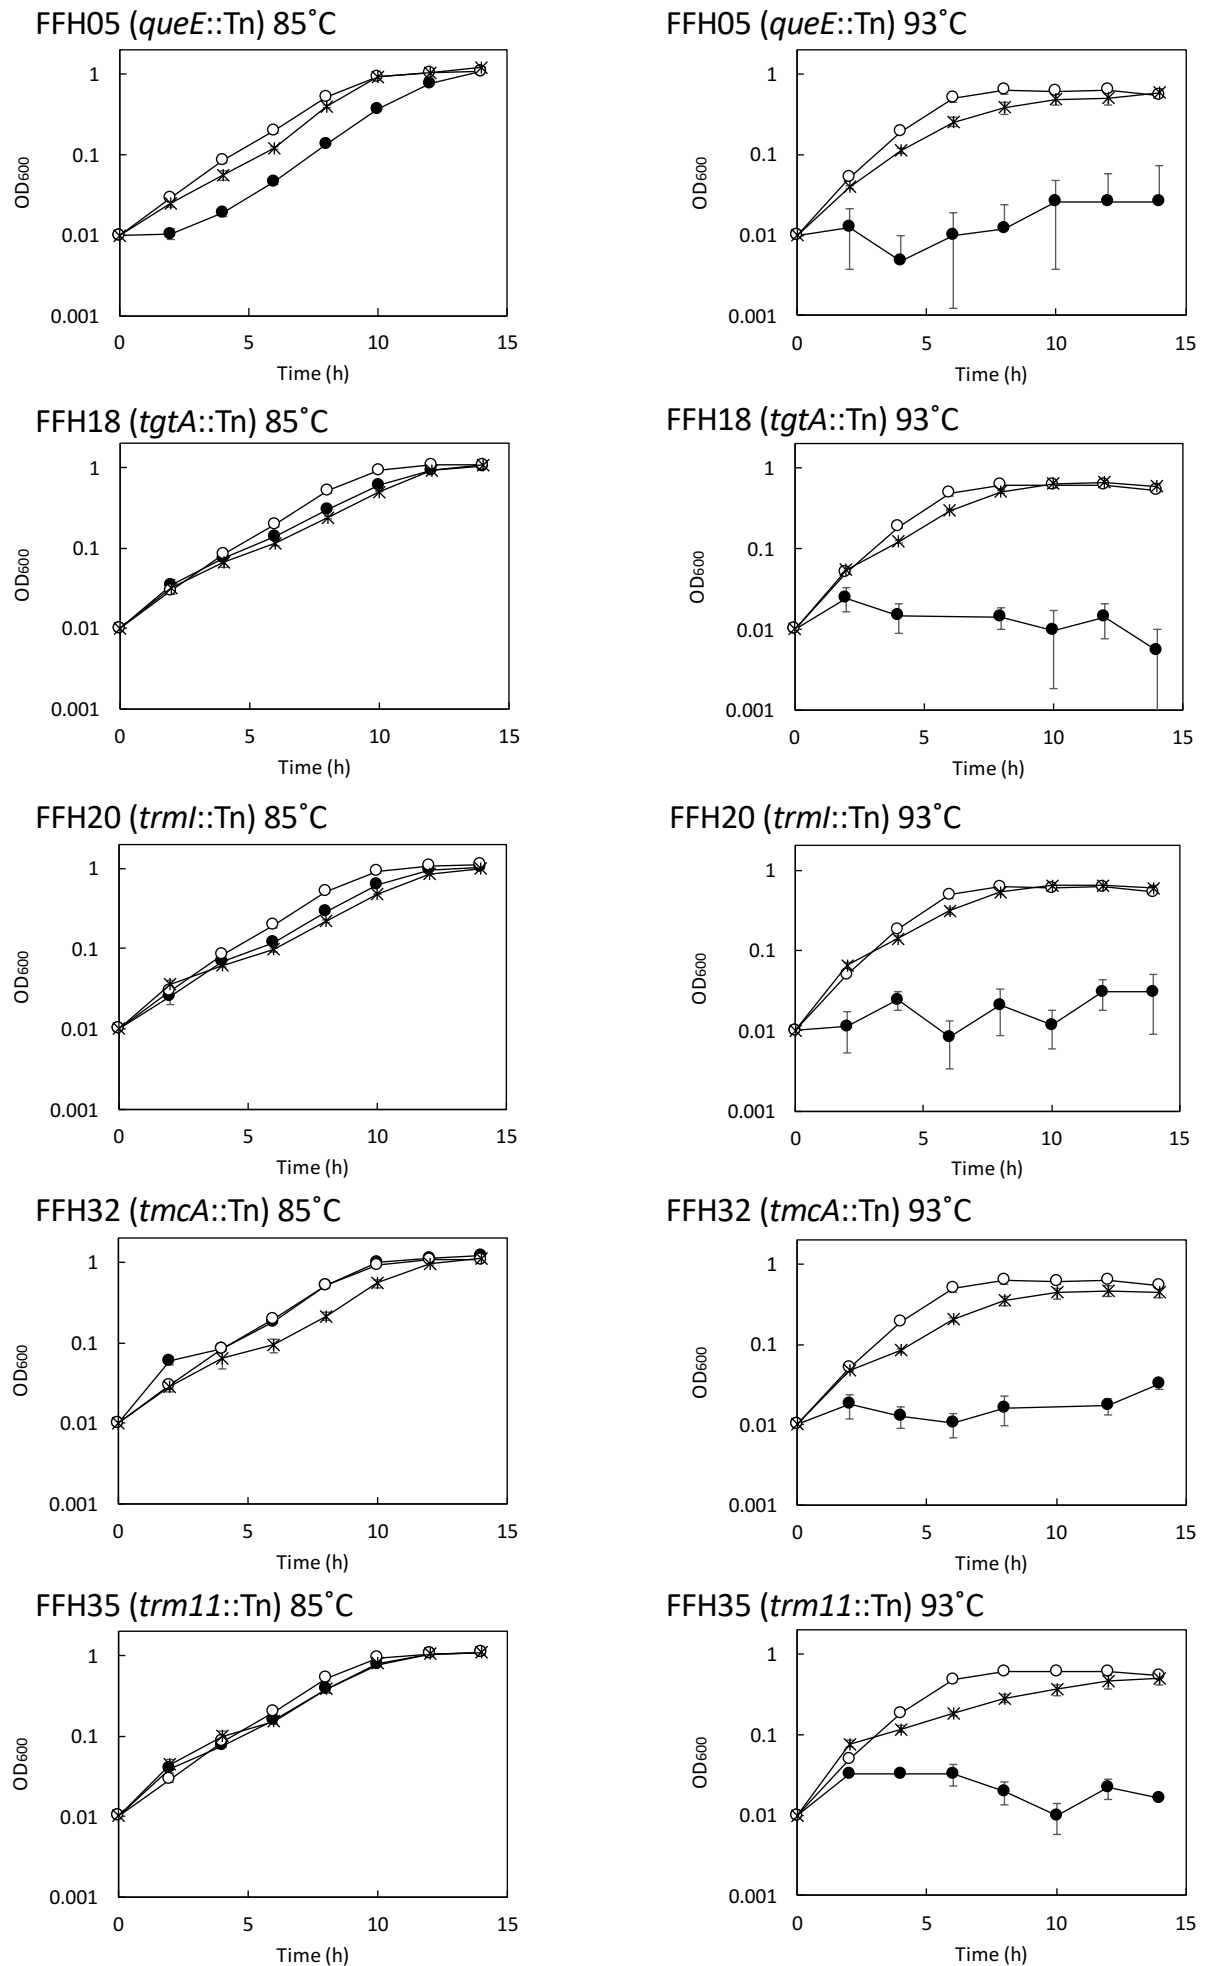

Fig. S2. Growth properties of *T. kodakarensis* tRNA modification mutants (●), their complemented strains (×), and control strain KD2239 (○) (n = 3).

[Other mutants]

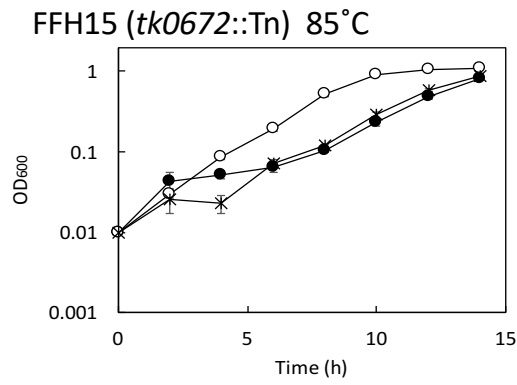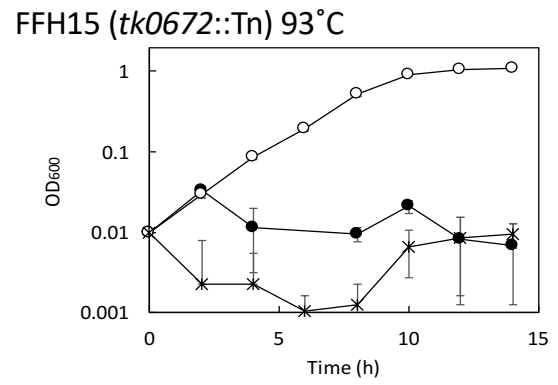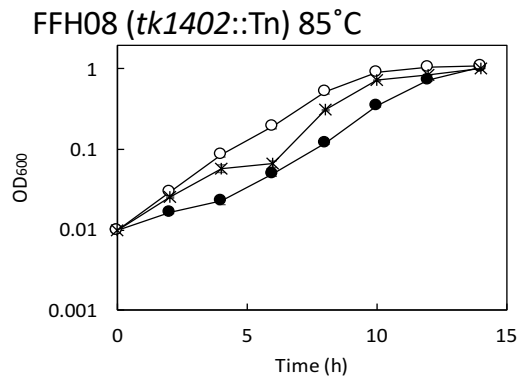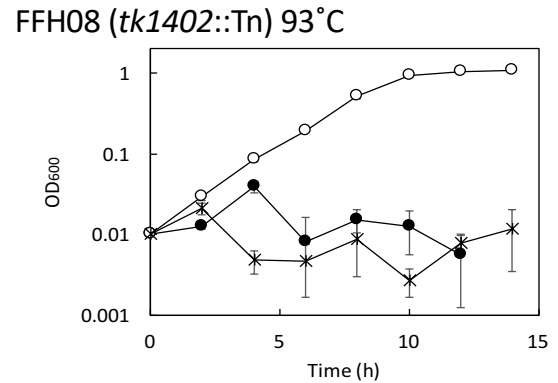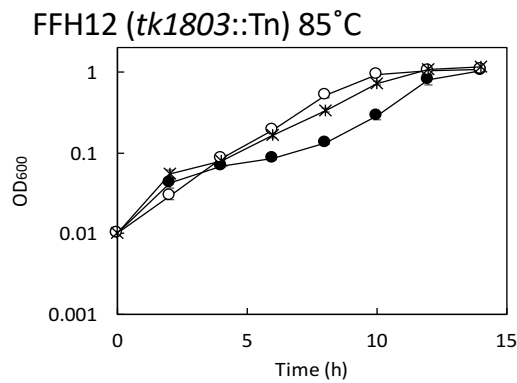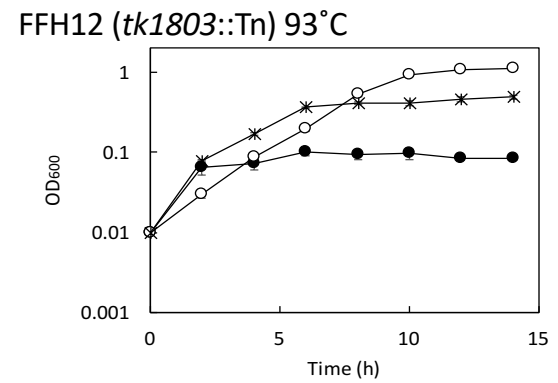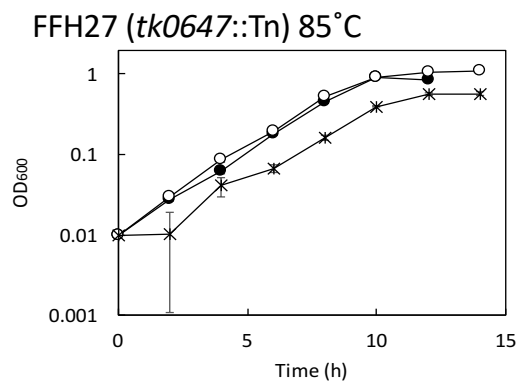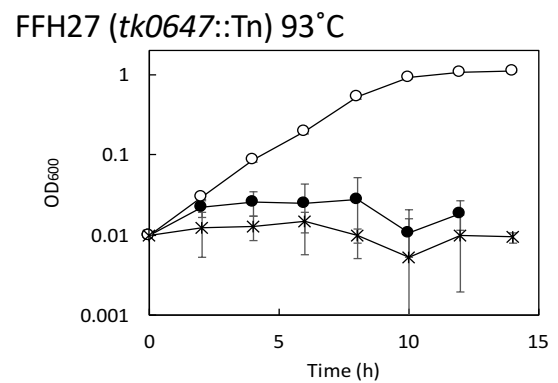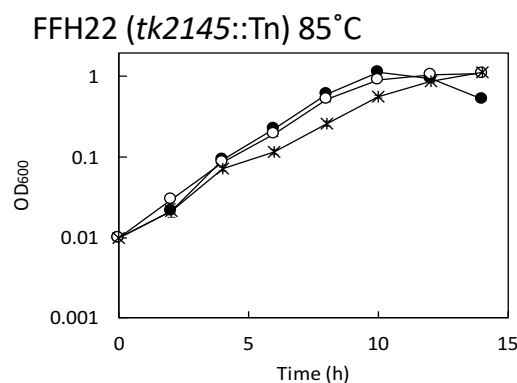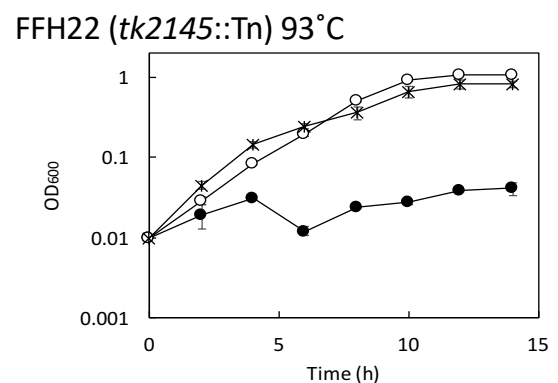

Fig. S3. Growth properties of *T. kodakarensis* thermosensitive mutants other than tRNA modification mutants (●), their complemented strains (×), and control strain KD2239 (○) (n = 3).

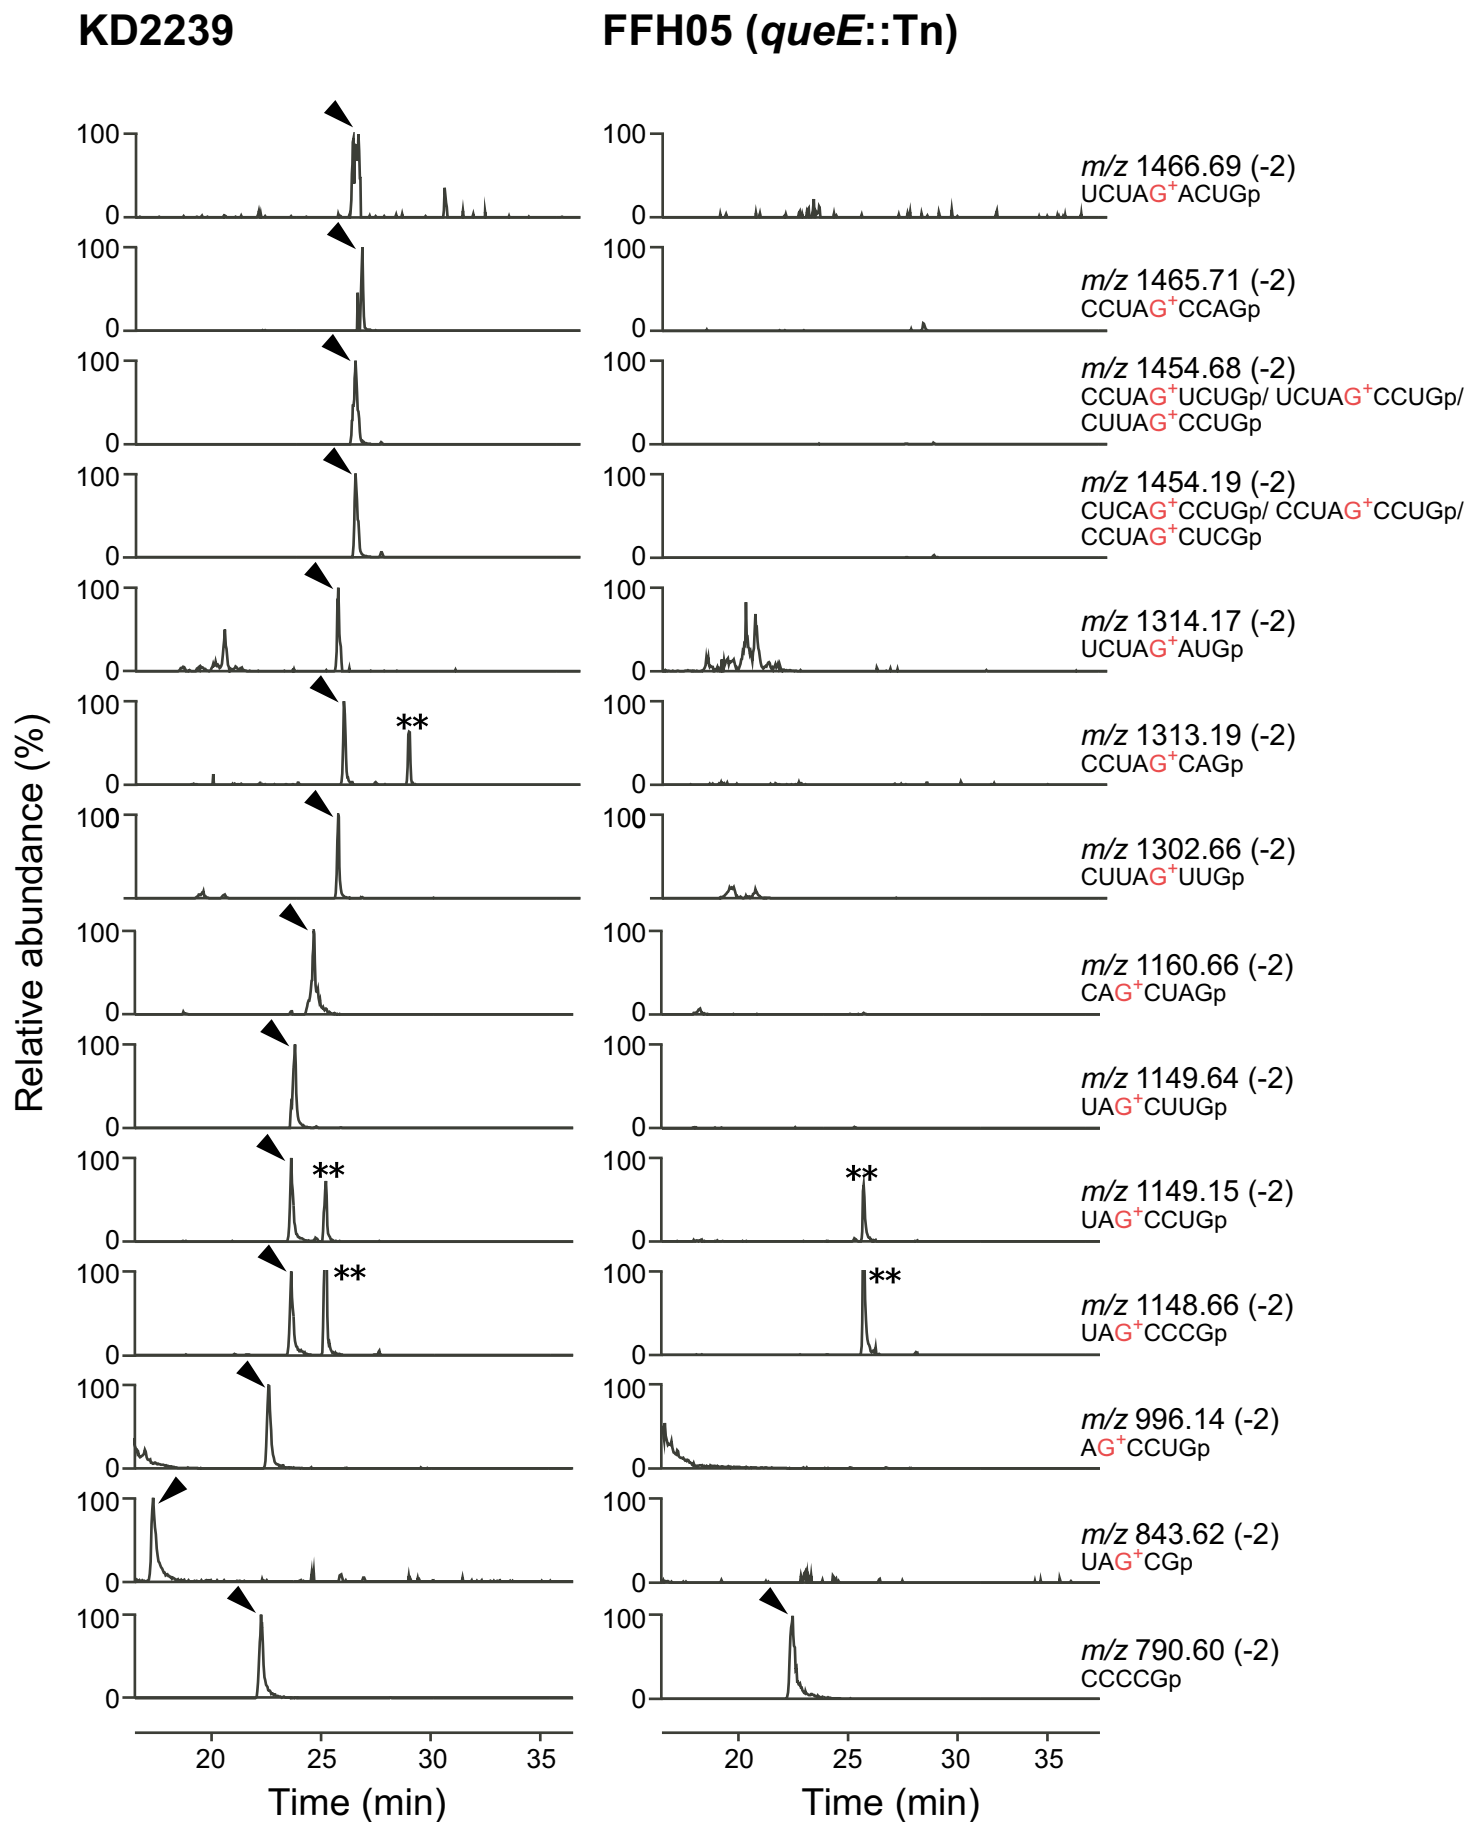

Fig. S4. Shotgun analysis of tRNA fragments generated by RNase T<sub>1</sub>-digestion of tRNA extracted from *T. kodakarensis* KD2239 and FFH05 (*queE::Tn*). The panels represent the mass chromatograms that detect negatively charged ions of RNA fragment containing a nucleotide at position 15. The relative abundance represents relative intensity of each peak normalized by the intensity of CCCCg<sub>p</sub> fragment. The peaks of the corresponding fragments are indicated by black arrowheads. Double asterisks indicate unassigned ions.

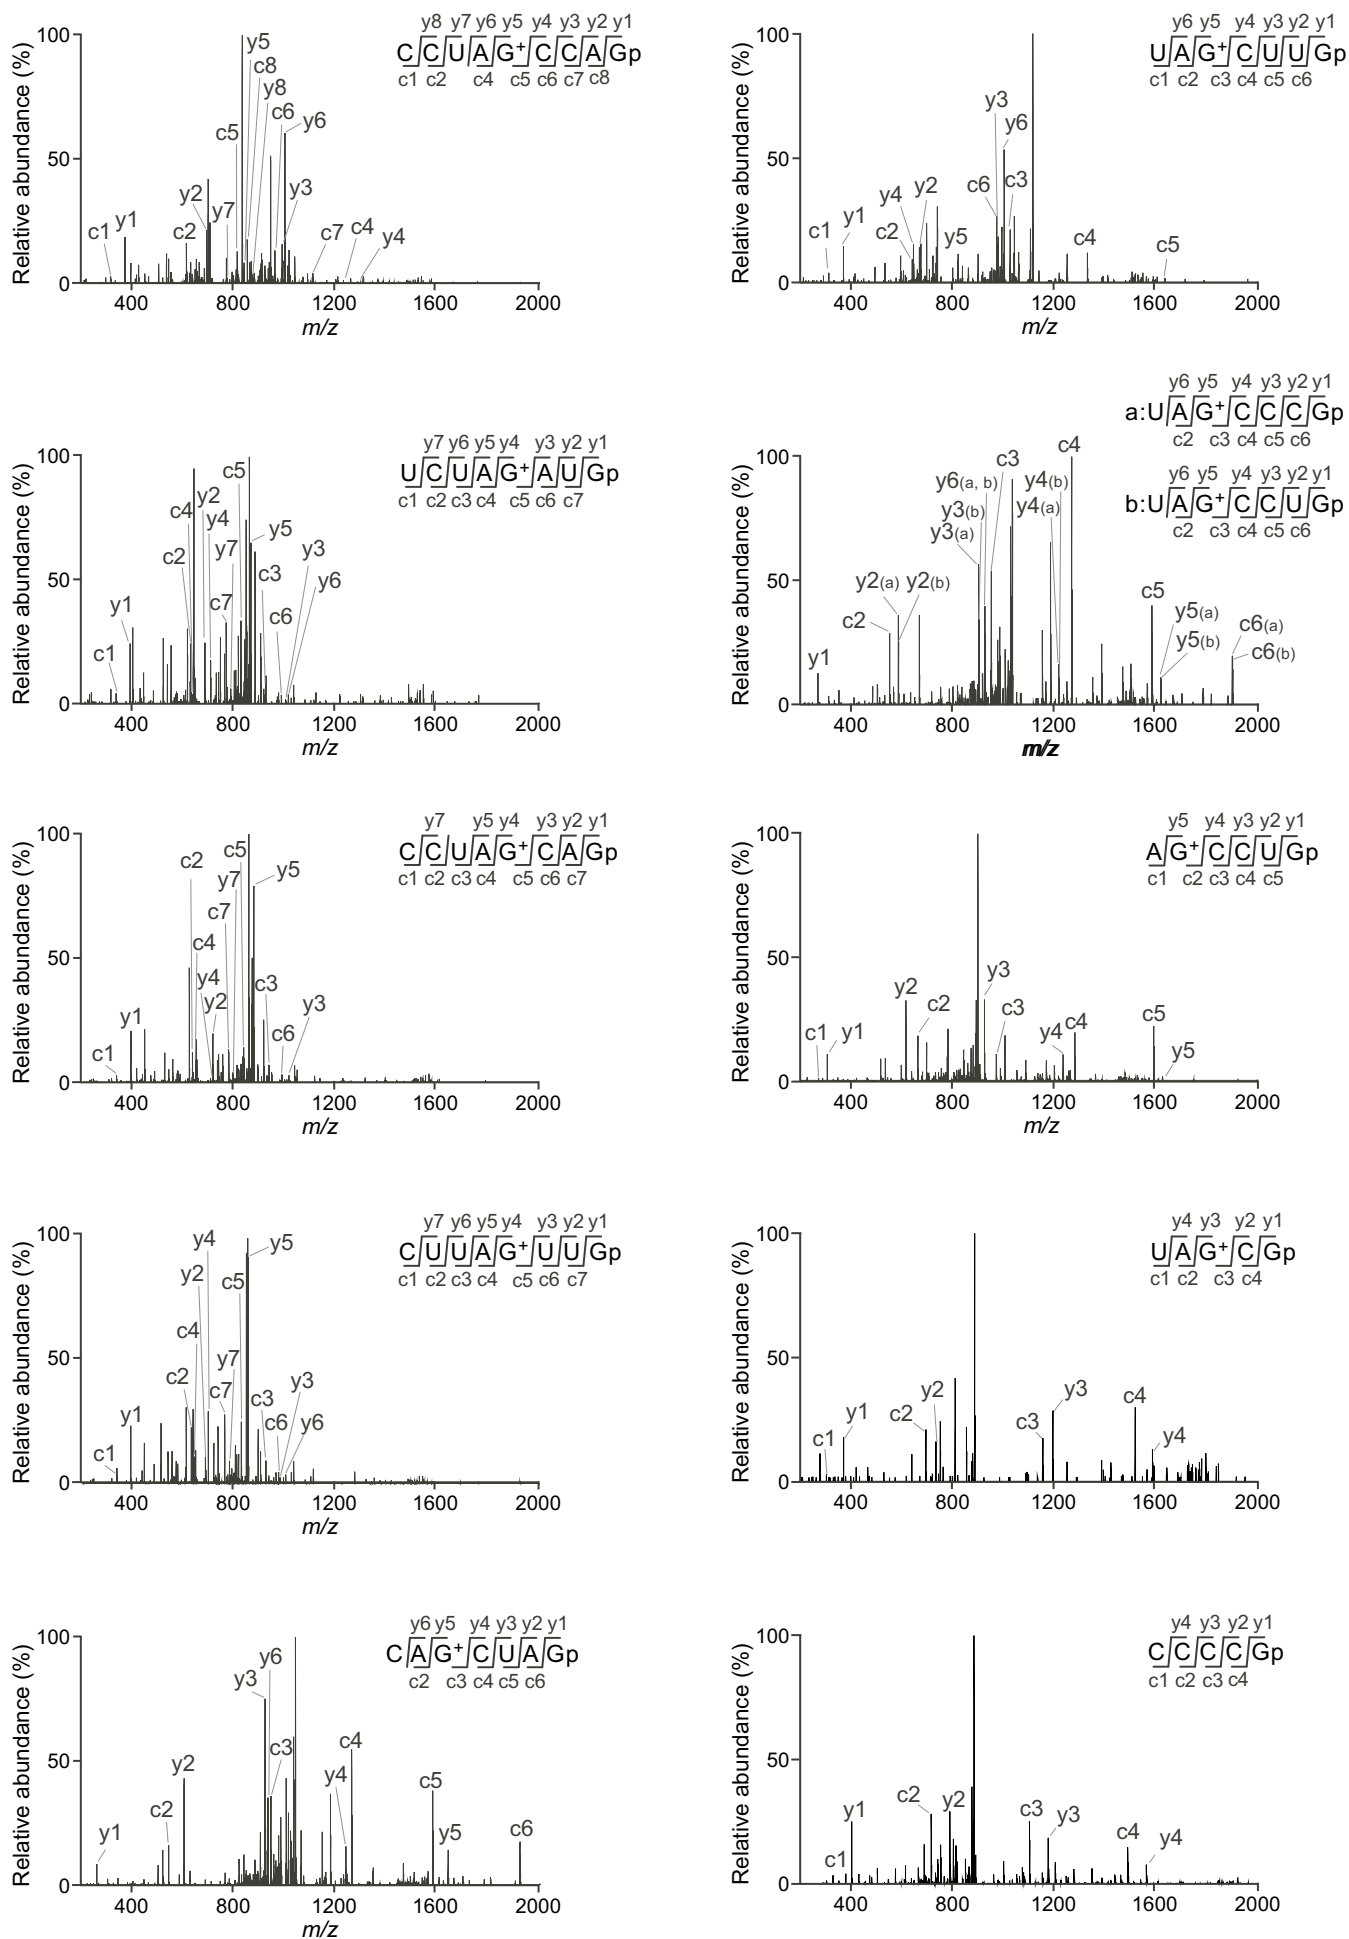

Fig. S5. CID spectra of ten RNA fragments having G<sup>+</sup>15 along with CCCCp fragment used as the internal standard in Fig. S4. Negatively charged ions of the individual fragments were used as precursor ions for CID analysis. The product ions in each the CID spectrum are assigned on the sequences.

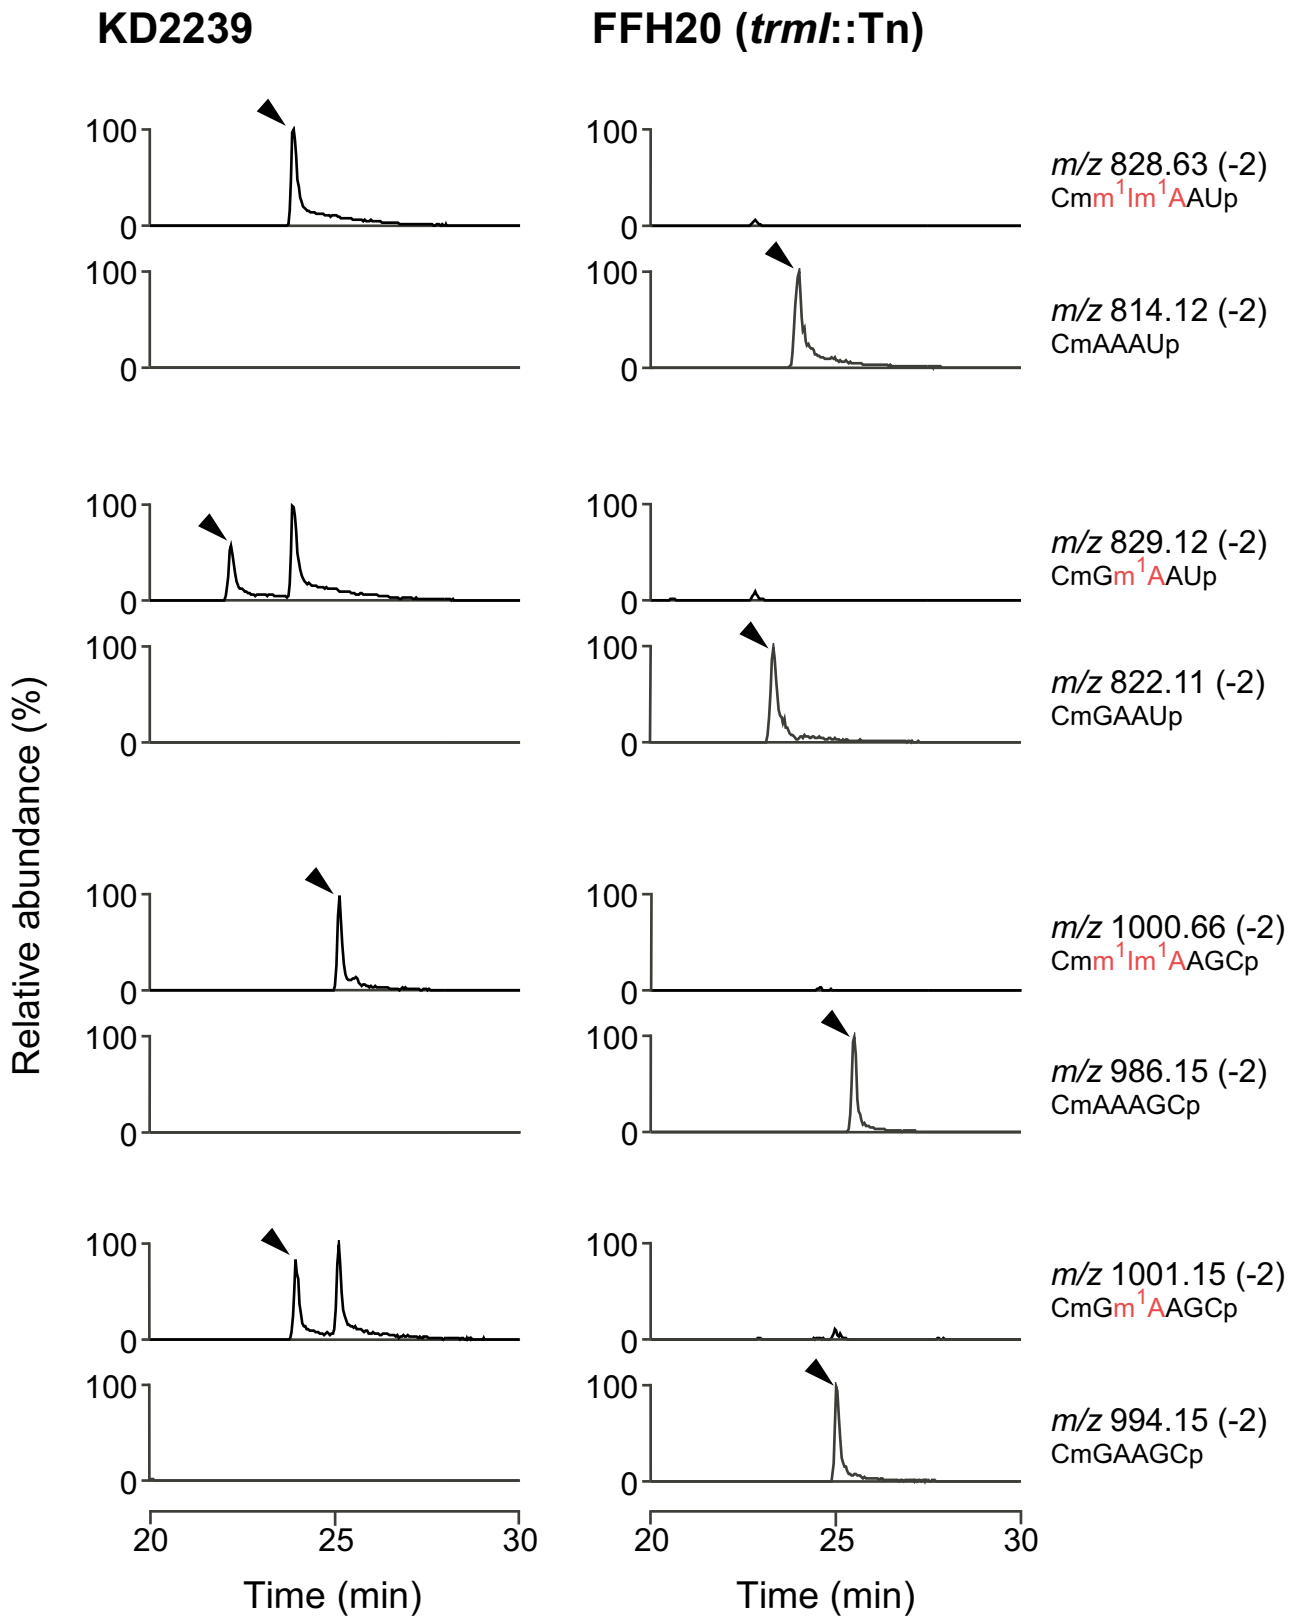

Fig. S6. Shotgun analysis of tRNA fragments generated by RNase A-digestion of tRNA extracted from *T. kodakarensis* KD2239 and FFH20 (*trmI::Tn*). The panels represent the mass chromatograms that detect divalent negatively charged ions of RNA fragment containing nucleotides from positions 56 to 60. The relative abundance represents relative intensity of each peak normalized by the highest peak. The peaks of the assigned fragments are indicated by black arrowheads

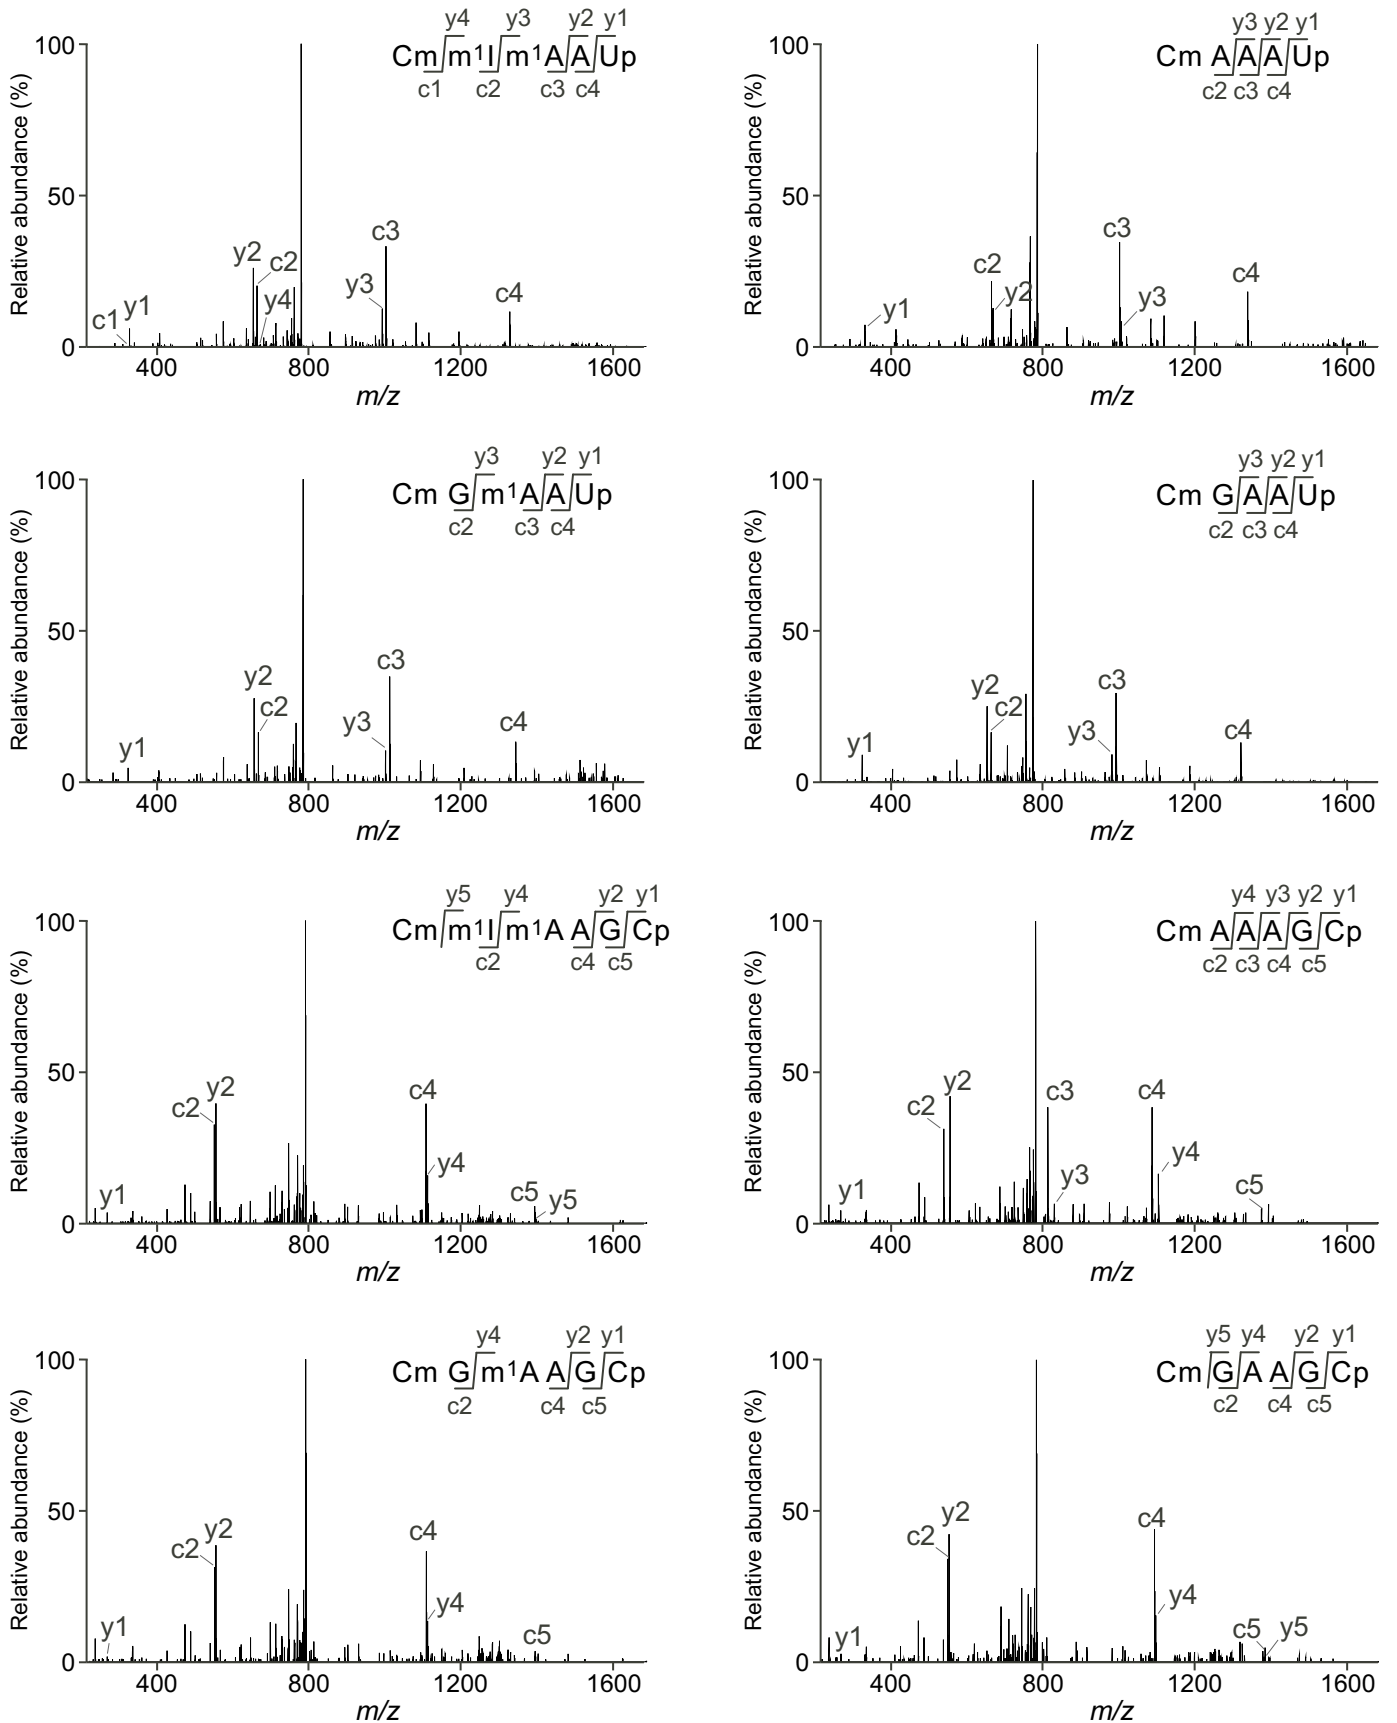

Fig. S7. CID spectra of eight RNase A digested-RNA fragments detected in Fig. S6. Negatively charged ions of the individual fragments were used as precursor ions for CID analysis. The product ions in each the CID spectra are assigned on the sequences.

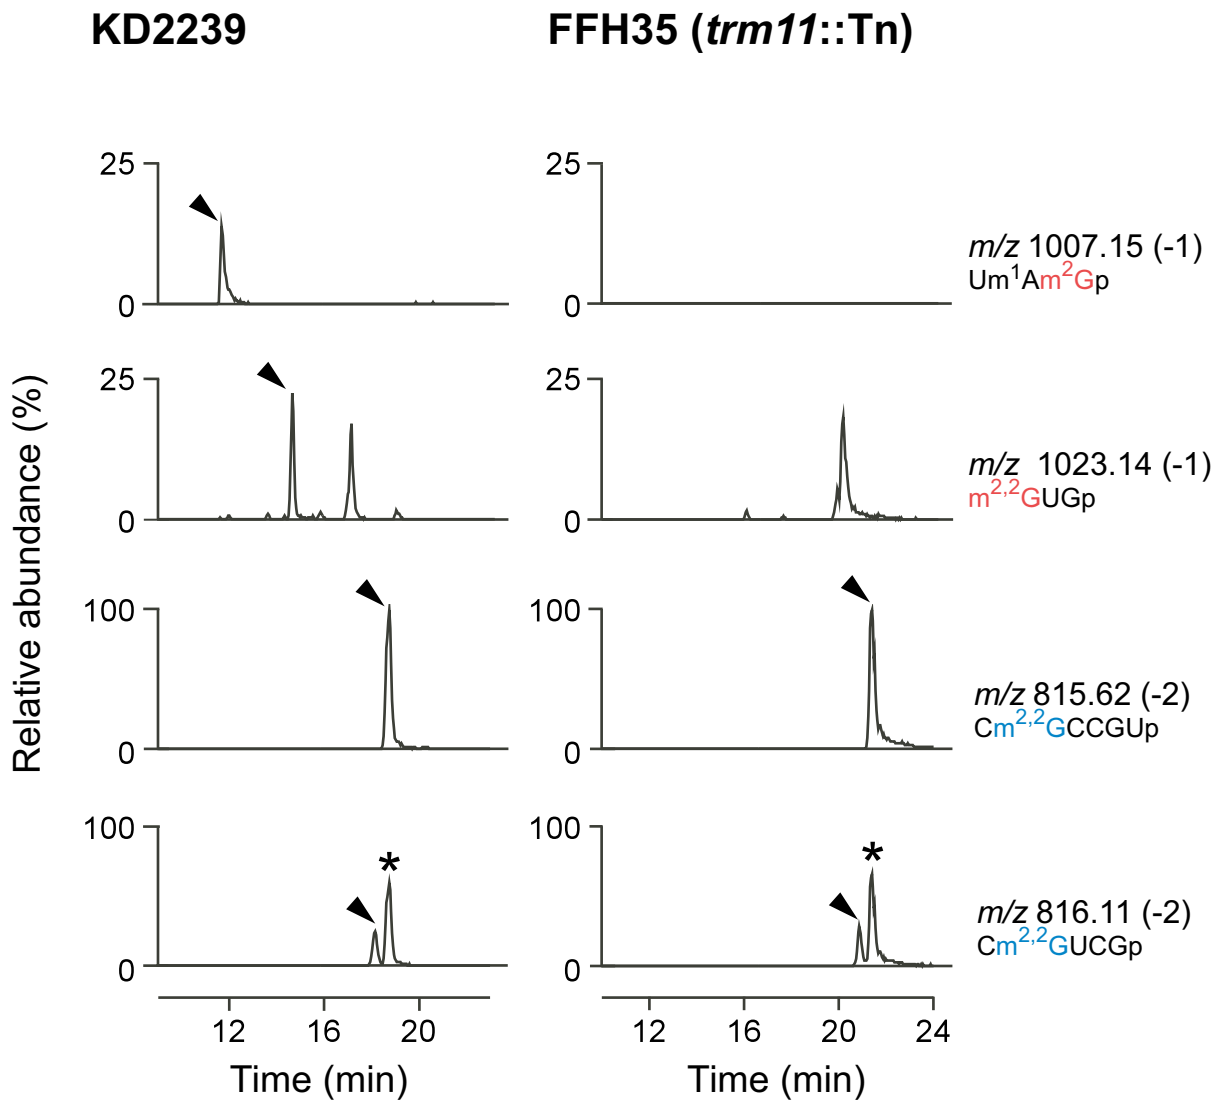

Fig. S8. Shotgun analysis of tRNA fragments generated by RNase T<sub>1</sub>-digestion of tRNA extracted from *T. kodakarensis* KD2239 and FFH35 (*trm11::Tn*). The panels represent the mass chromatograms that detect monovalent or divalent negatively charged ions of RNA fragments containing the nucleotide at position 10 or 26. The relative abundance represents relative intensity of each peak normalized by intensities of Cm<sup>2,2</sup>GCCGp fragments. The peaks of the assigned fragments are indicated by black arrowheads. Asterisks indicate peaks of Cm<sup>2,2</sup>GCCGp fragments. Guanosines at positions 10 and 26 are shown in red and blue, respectively.

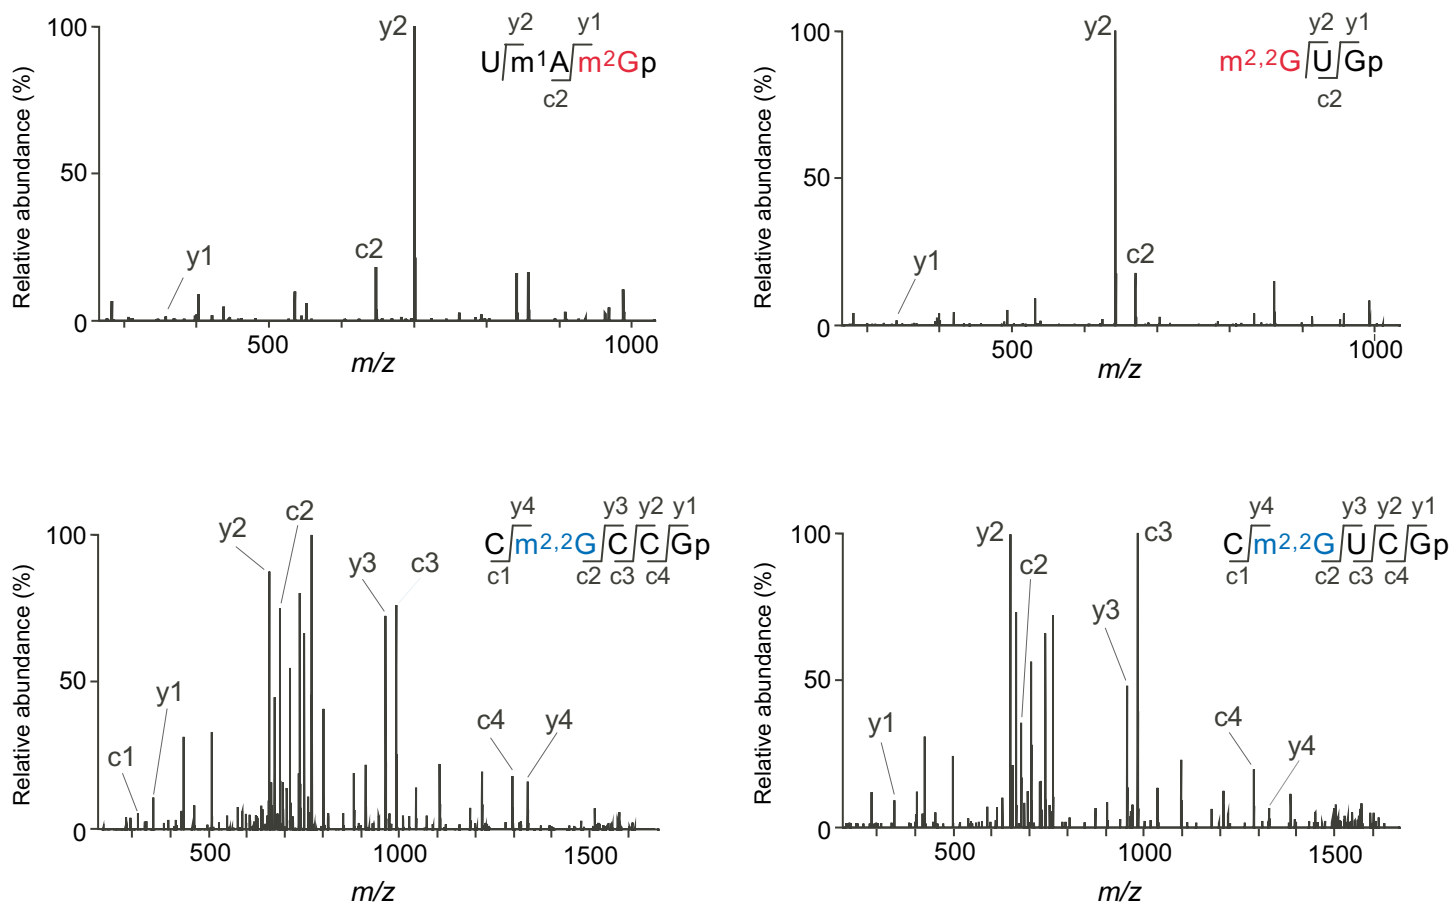

Fig. S9. CID spectra of four RNase T<sub>1</sub>-digested tRNA fragments containing m<sup>2</sup>G/m<sup>2,2</sup>G from *T. kodakarensis* KD2239 detected in Fig. S8. Monovalent or divalent negative ions were used as precursor ions for CID analysis. The product ions in each the CID spectra are assigned on the sequences. Guanosines at positions 10 and 26 are shown in red and blue, respectively.
